# Supplementary material
Source: MDPI journal article supplement (https://www.mdpi.com/2227-9040/10/5/195)
Supplement: s1 [file s1]

# Peptide-Conjugated Aggregation-Induced Emission Fluorogenic Probe for Glypican-3 Protein Detection and Hepatocellular Carcinoma Cells Imaging

Song Zhang <sup>1,†</sup>, Jiangbo Jing <sup>1,†</sup>, Lingchen Meng <sup>1</sup>, Bin Xu <sup>1</sup>, Xibo Ma <sup>2,3,\*</sup> and Wenjing Tian <sup>1,\*</sup>

<sup>1</sup> State Key Laboratory of Supramolecular Structure and Materials, College of Chemistry Jilin University, Changchun 130012, China; zhangsong20@mails.jlu.edu.cn (S.Z.); jingjb17@mails.jlu.edu.cn (J.J.); 20124632@s.jlu.edu.cn (L.M.); xubin@jlu.edu.cn (B.X.)

<sup>2</sup> CBR&NLPR, Institute of Automation, Chinese Academy of Sciences, Beijing 100049, China

<sup>3</sup> School of Artificial Intelligence, University of Chinese Academy of Sciences, Beijing 100049, China

\* Correspondence: xibo.ma@ia.ac.cn (X.M); wjtian@jlu.edu.cn (W.T.)

† Co-first authors: Song Zhang, Jiangbo Jing

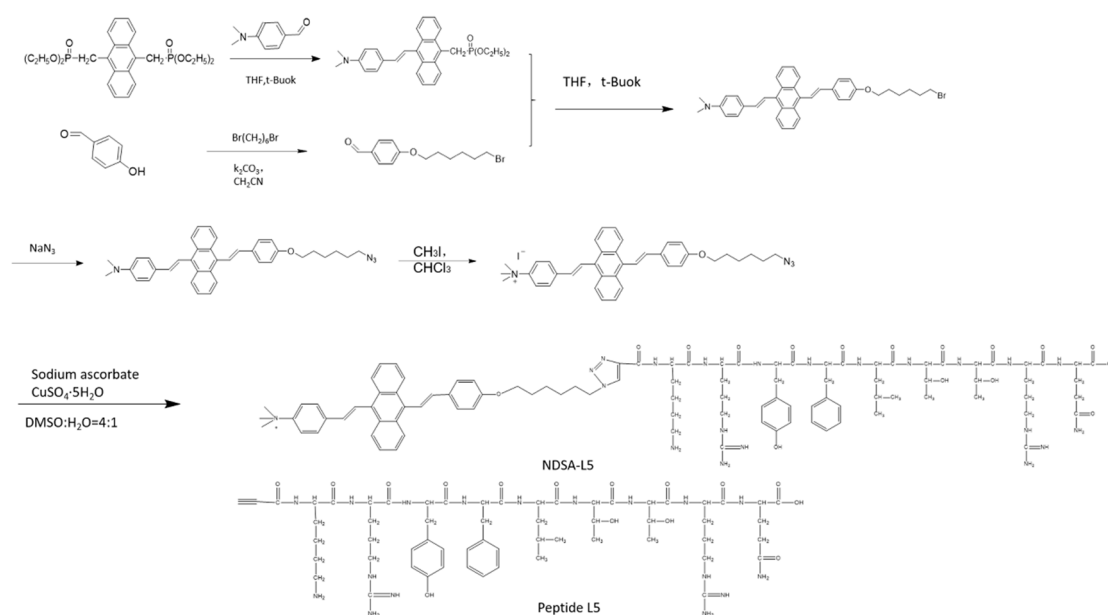

**Scheme S1.** The synthetic route of NDSA-L5.

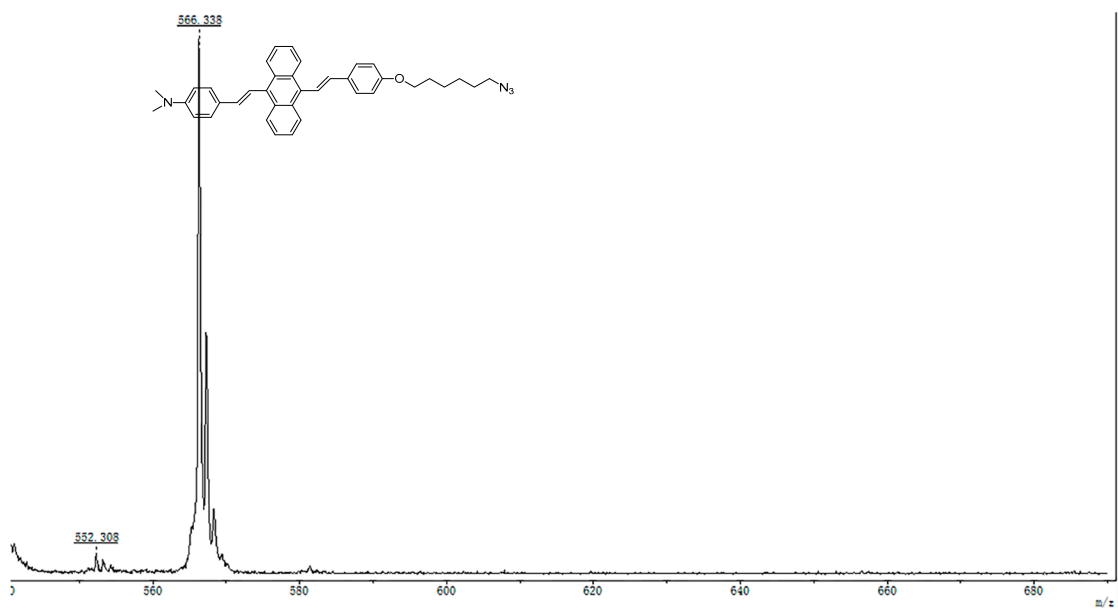

Figure S1. MALDI-TOF mass spectra of compound 5.

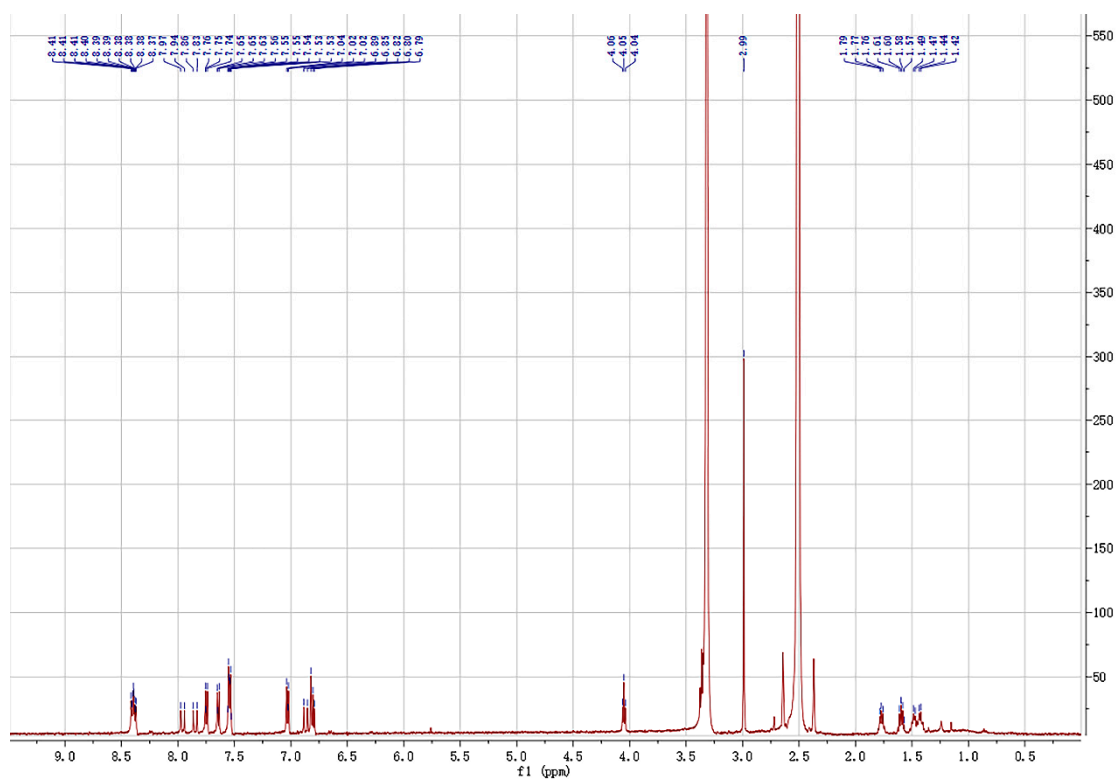

Figure S2. <sup>1</sup>H NMR spectrum of compound 5 recorded in DMSO-D<sub>6</sub>.

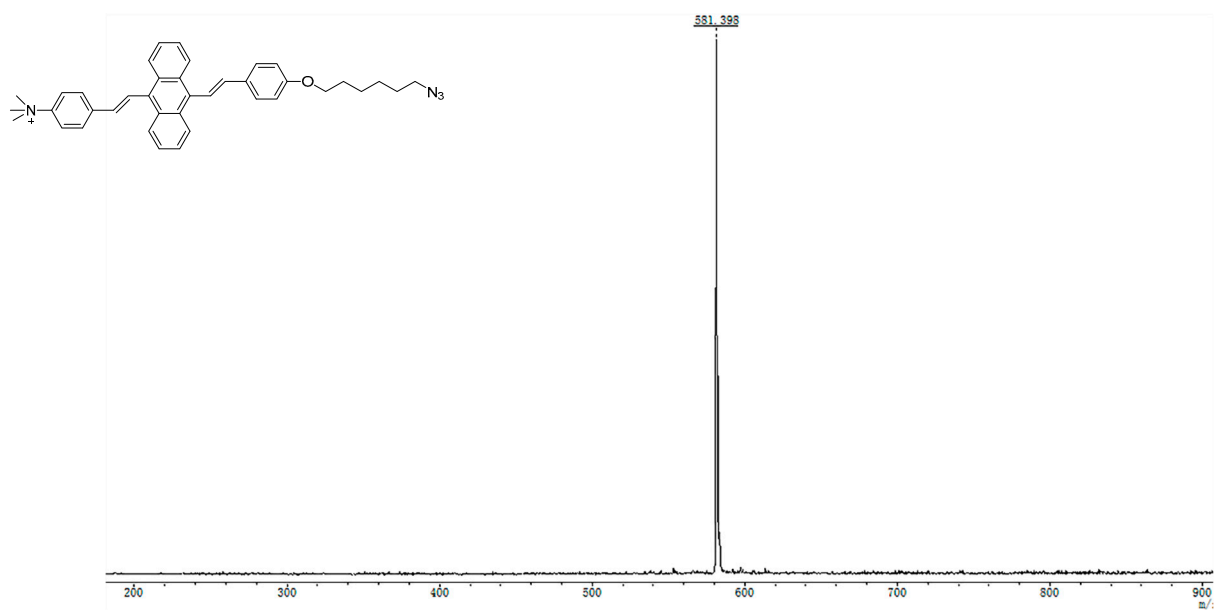

Figure S3. MALDI-TOF mass spectra of NDSA-N3.

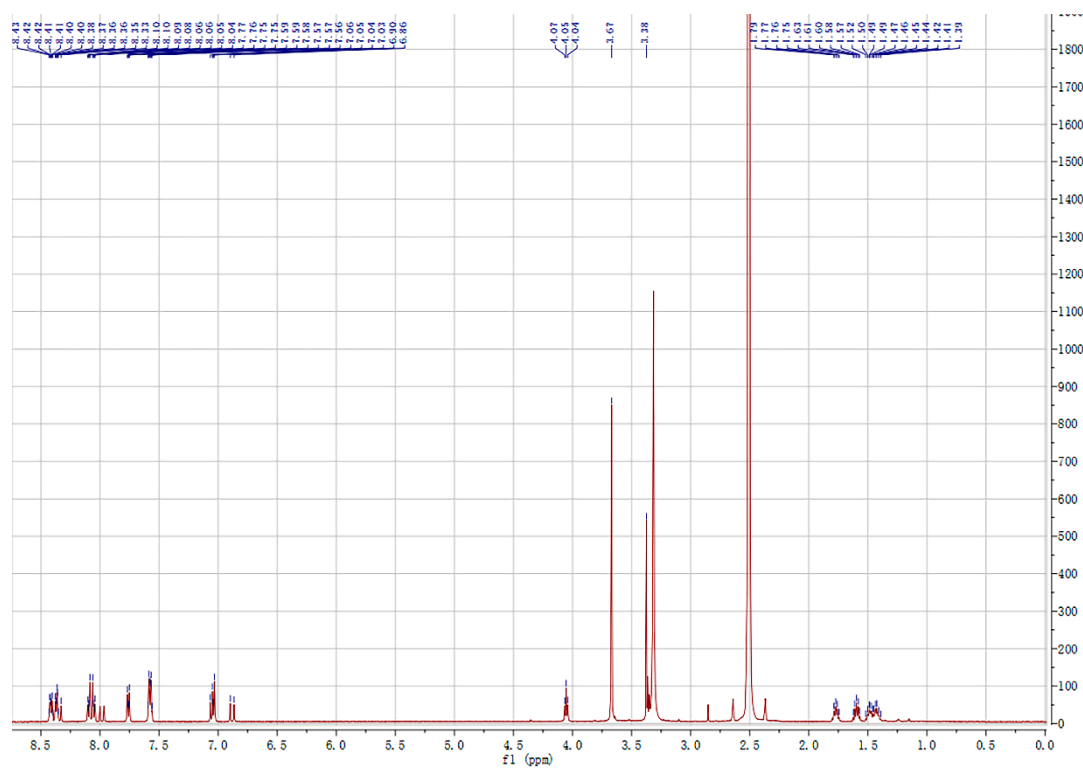

Figure S4. <sup>1</sup>H NMR spectrum of NDSA-N3 recorded in DMSO-D<sub>6</sub>.

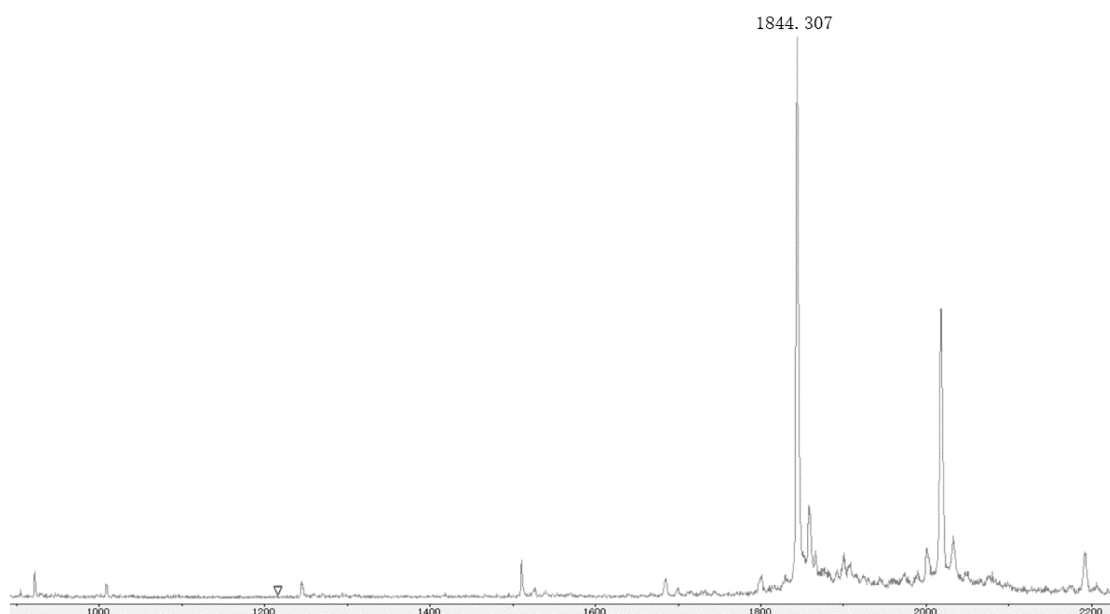

**Figure S5.** MALDI-TOF mass spectra of NDSA-L5.

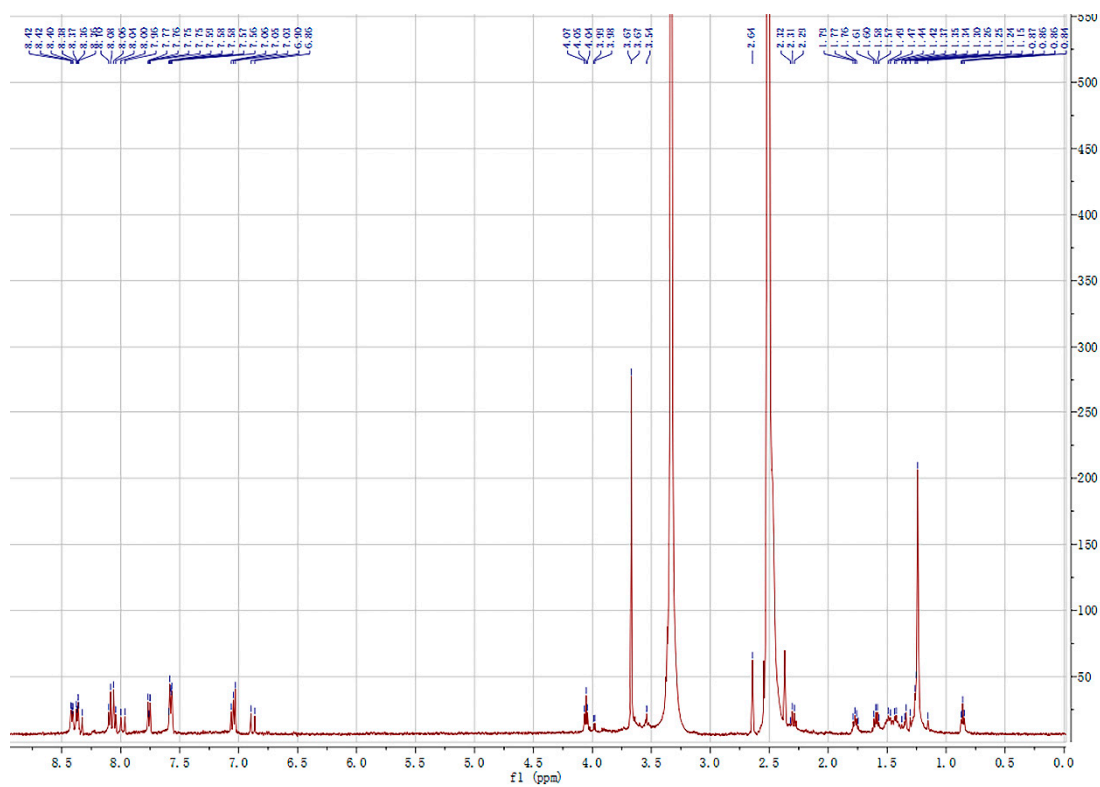

**Figure S6.** <sup>1</sup>H NMR spectrum of NDSA-L5 recorded in DMSO-D6.

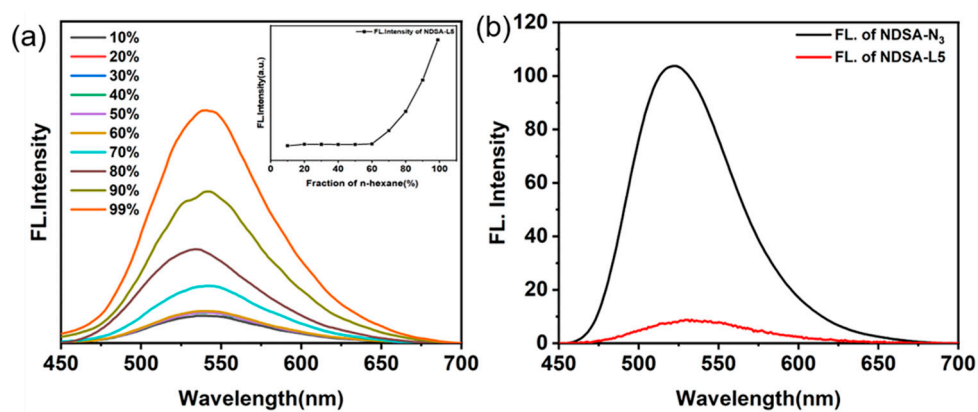

**Figure S7.** a) Fluorescence spectrum of NDSA-L5 in different n-hexane concentration n-hexane/DMSO solution and NDSA-L5 in n-hexane/DMSO. Line graph of emission intensity of n-hexane volume fraction change, b) The PL intensities of NDSA-N3 and NDSA-L5 in the PBS buffer.

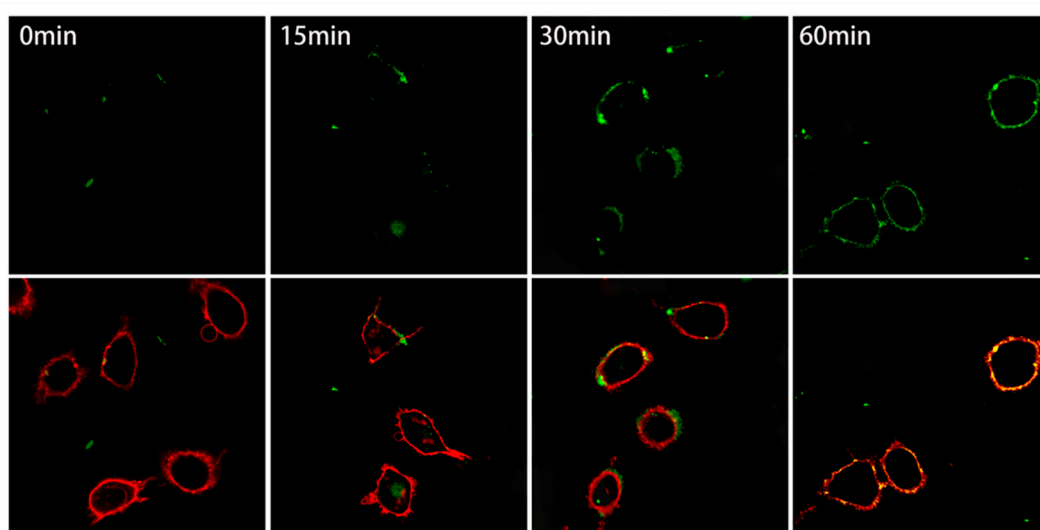

**Figure S8.** Time-uptake fluorescence imaging results of probe NDSA-L5 on Hep-G2 cells.

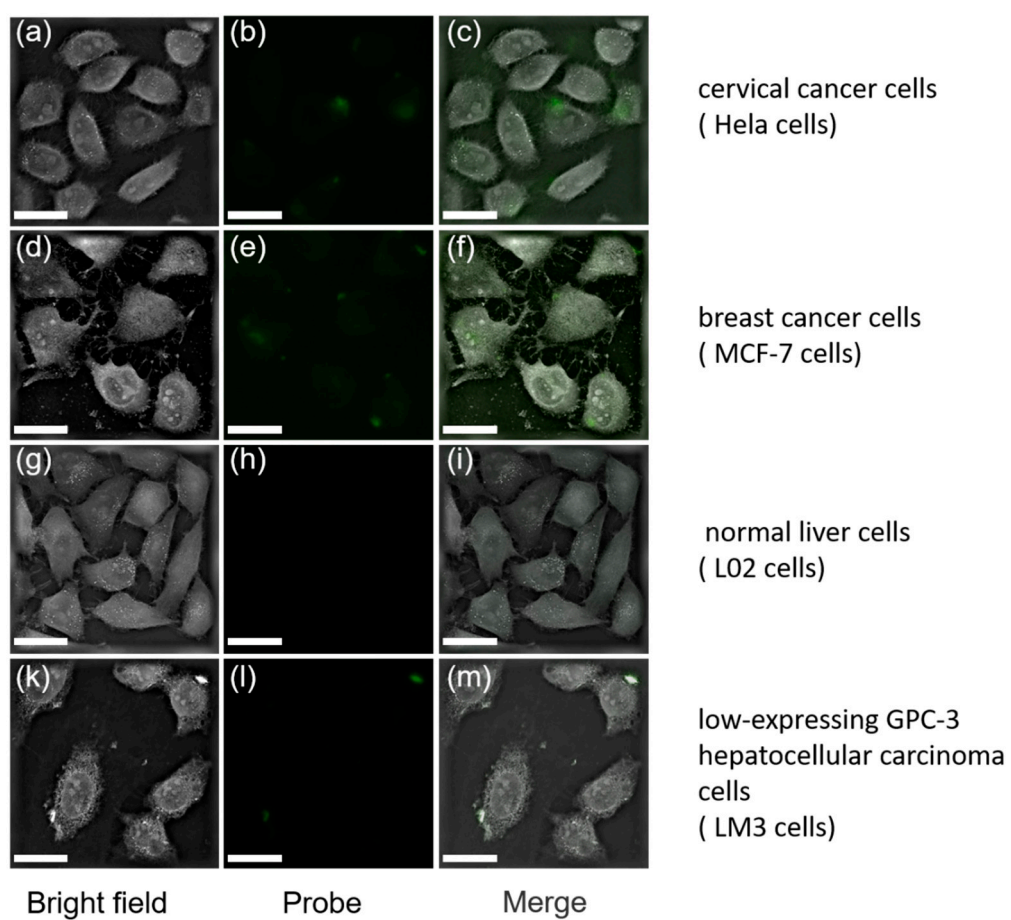

**Figure S9.** Fluorescence images of cervical cancer cells (Hela cells, a-c), breast cancer cells (MCF-7 cells d-f), normal liver cells (L02 cells g-i), low-expressing hepatocellular carcinoma cells (LM3 cells k-m) Overlay imaging. Scale bar, 20  $\mu$ m.

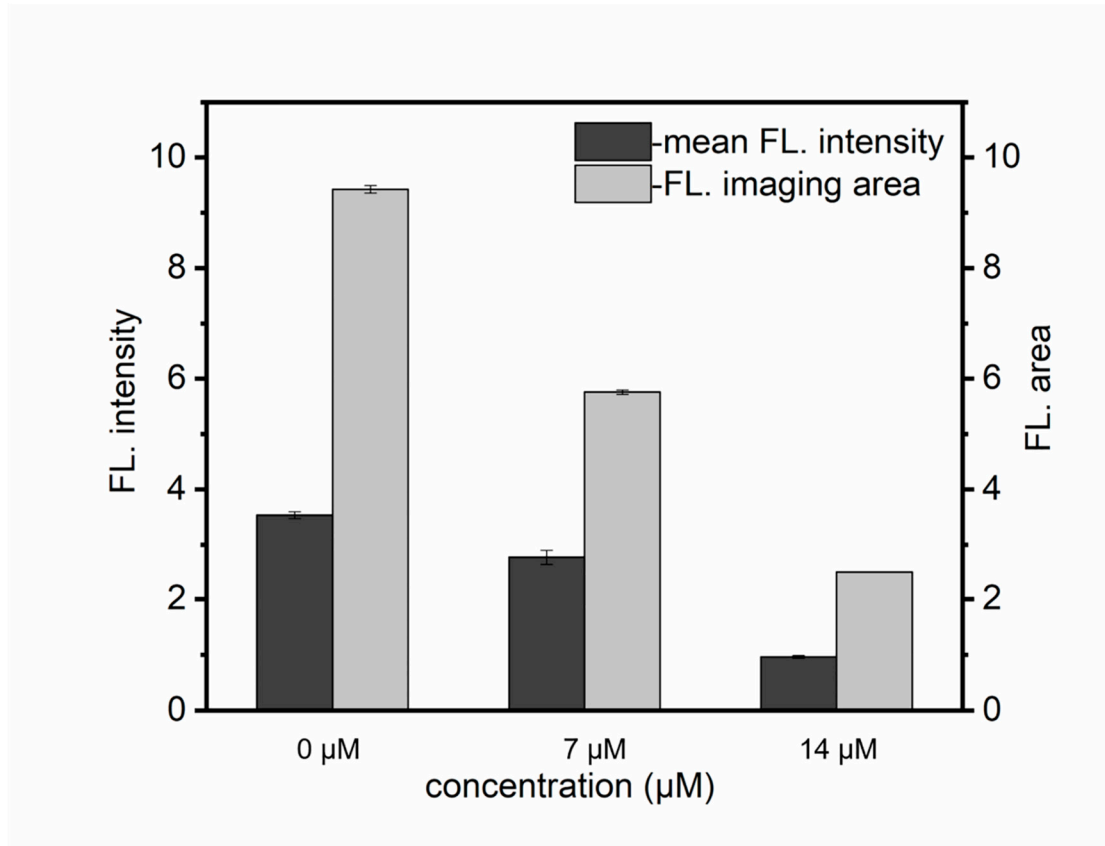

**Figure S10.** Mean fluorescence intensity and fluorescence imaging area of Hep-G2 cell and their corresponding with different amounts of peptides L5 prior to NDSA-L5 treatment.

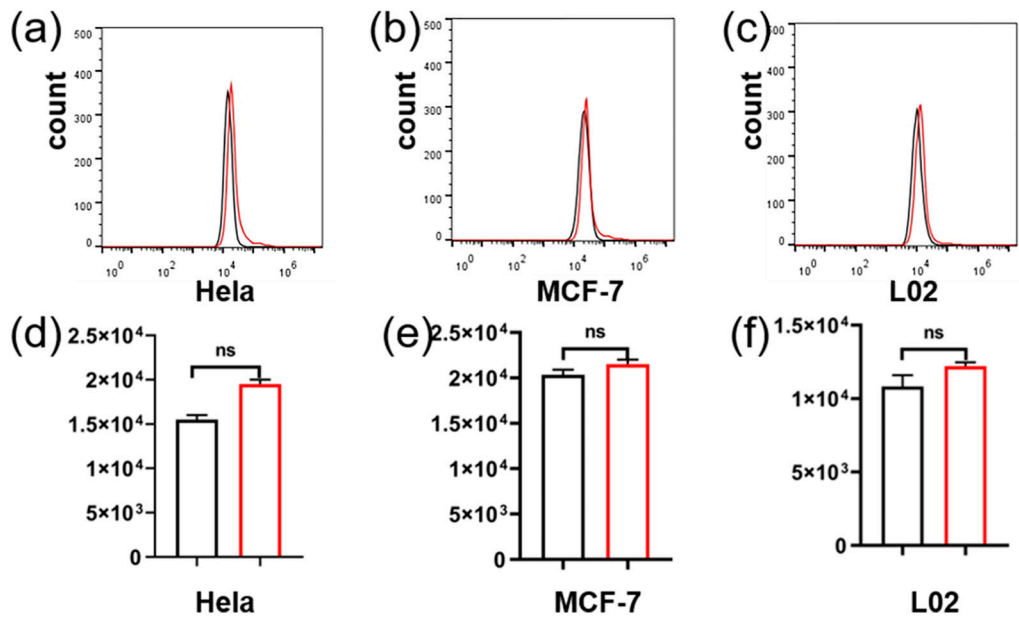

**Figure S11.** Flow cytometry histograms of different cell lines, a)& d) HeLa, b)& e) MCF-7, c)& f) L02, after incubation with NDSA-L5 for 90 min.

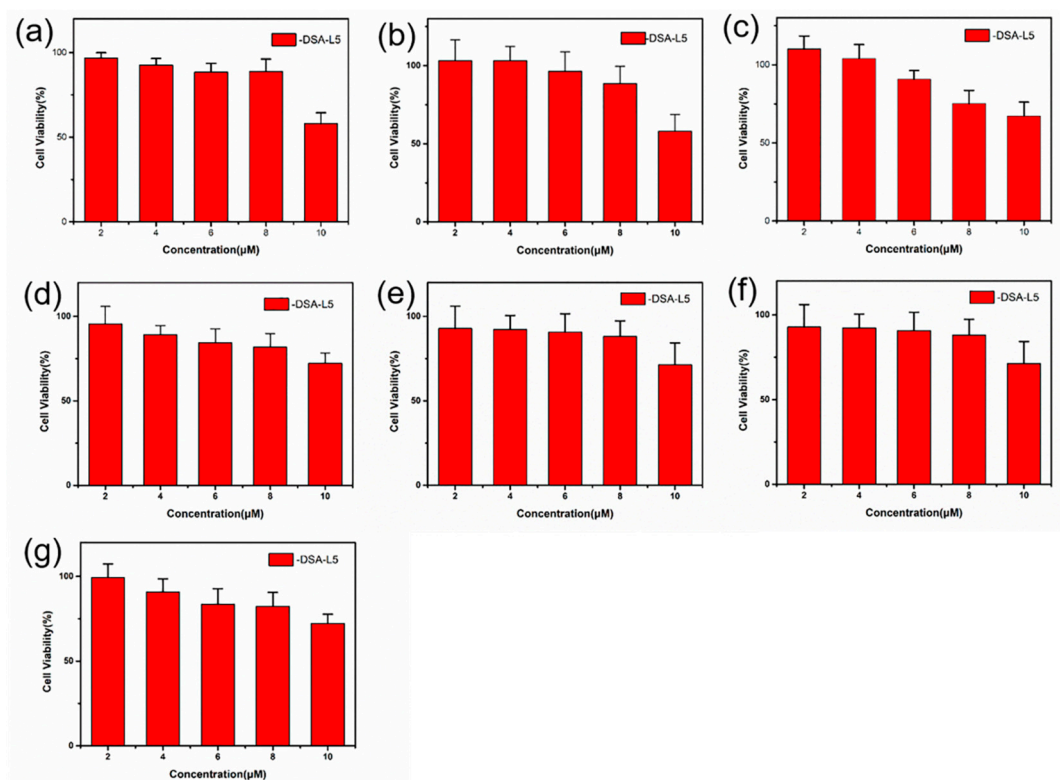

**Figure S12.** Biological toxicity of NDSA-L5 in Hep-G2 a), LM3 b), huh-7 c), MCF-7 d), Hepa e), Hep-3B f), L02 g).

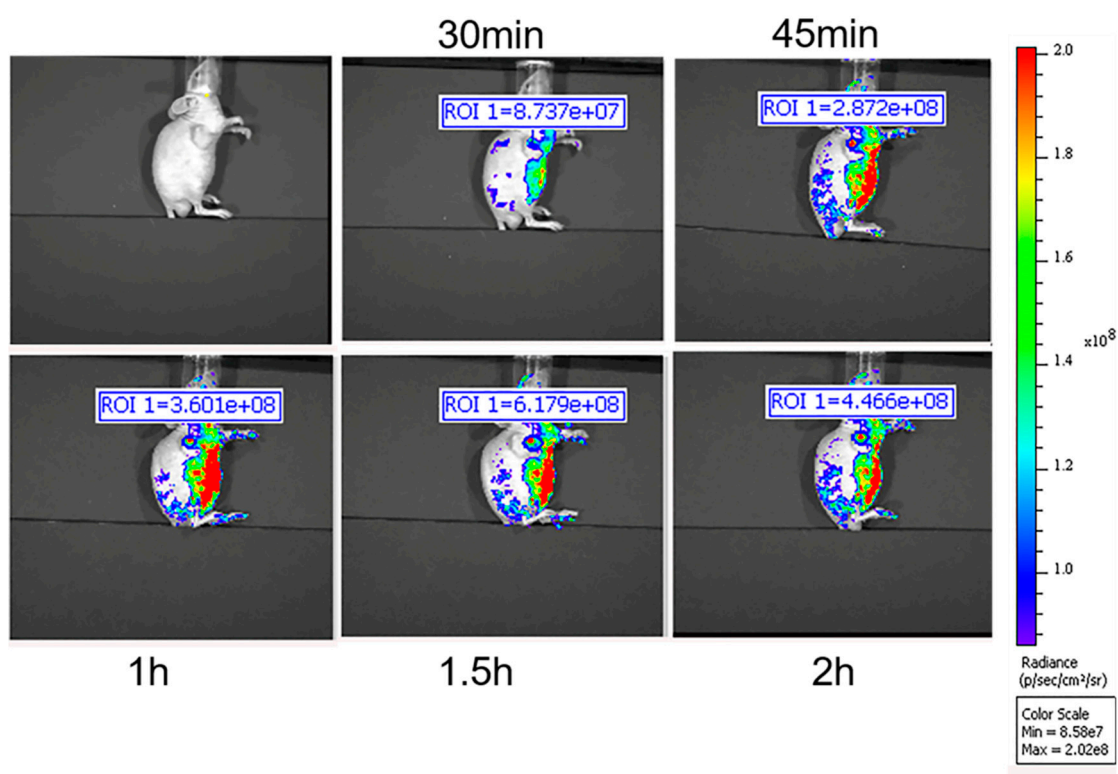

**Figure S13.** Image of tumor site fluorescence changing with time.

**Table S1.** Comparison of BTCA with other representative GPC-3 fluorescence probes.

| <b>Probes</b> |                                                | Solvents           | $\lambda_{\text{Ex}}/\lambda_{\text{Em}}$ Stokes shifts (nm)        | Detection Limit | Biological Application                        | References |
|---------------|------------------------------------------------|--------------------|---------------------------------------------------------------------|-----------------|-----------------------------------------------|------------|
| <b>Names</b>  | Structures                                     |                    |                                                                     |                 |                                               |            |
| NDSA-L5       | molecular imaging probe                        | PBS(1 mM, pH 7.4)  | $\lambda_{\text{Ex}} = 410$<br>$\lambda_{\text{Em}} = 537$<br>127nm | 0.26nM          | Hep-G2,Huh-7,Hep-3B,Hela,MCF-7, LM3,L02, mice | This work  |
| P-probe       | 2D material-based supramolecular imaging probe | PBS(10 mM, pH 7.4) | $\lambda_{\text{Ex}} = 558$<br>$\lambda_{\text{Em}} = 586$<br>28nm  | 0. 19 nM        | Hep-G2,293T, tissue                           | 38         |
